# Supplementary material for: Chronic antihypertensive therapy with thiazide diuretics in older women and risk of osteoporotic vertebral fractures: A recently much-debated association
Source: Preprints.org preprint supplement (doi:10.20944/preprints201707.0082.v1), 2017-07-28
Supplement: Supplementary file 1 [file supplementary]

Table 1 Baseline demographic characteristics

|                                        | Patients with thiazide-induced hyponatremia( no. 80) | Patients without hyponatremia on thiazide ( no.158) | p-value           |
|----------------------------------------|------------------------------------------------------|-----------------------------------------------------|-------------------|
| Age ( years)                           | 74±8.5                                               | 65±7.5                                              | <i>p</i> < 0.0001 |
| Body mass index( kg/ m <sup>2</sup> )  | 22.6± 4.17                                           | 24.19± 3.38                                         | <i>p</i> = 0.0017 |
| Duration of follow-up( months)         | 56.1±10.5                                            | 54.8± 10.5                                          | <i>p</i> = 0.3705 |
| Ever smoked                            | 23(28.7%)                                            | 48(30.3%)                                           | <i>P</i> = 0.91   |
| Independent walking ability            | 50(62.5%)                                            | 128(81%)                                            | <i>p</i> = 0.0032 |
| Diabetes mellitus                      | 5(6.25%)                                             | 3(2%)                                               | <i>p</i> = 0.122  |
| Living in long-stay geriatric facility | 3(4%)                                                | 11(7%)                                              | <i>p</i> = 0.394  |

Legend Continuous variables are expressed as mean ± standard deviation

|                                              |     | Patients with one or more vertebral fractures |     |       |
|----------------------------------------------|-----|-----------------------------------------------|-----|-------|
|                                              |     | yes                                           | no  | Total |
| Hyponatremia found during thiazide treatment | yes | 34                                            | 46  | 80    |
|                                              | no  | 14                                            | 144 | 158   |
| Total                                        |     | 48                                            | 190 | 238   |

|                    |                  |
|--------------------|------------------|
| Odds ratio         | 7.6025           |
| 95% CI             | 3.755 to 15.3923 |
| z statistic        | 5.636            |
| significance level | P < 0.0001       |

**Table 2** This 2 X2 contingency table shows that, in female hypertensive patients older than 70 years taking thiazide diuretics, the odds of experiencing one or more osteoporotic vertebral fractures is significantly ( $p < 0.0001$ ) higher among patients with hyponatremia( serum sodium level  $<135$  mEq/l) compared to those with normal serum sodium levels ( odds ratio:7.6025; 95% CI:3.755 to 15.3923). For further explanations, please see the text.

Legend: CI= Confidence interval

### TABLE 3 Multivariate logistic regression analysis

outcome variable: patients with one or more vertebral fractures

exposure variables: age( continuous);body mass index ( continuous); hyponatremia during thiazide therapy( dichotomous); inability for independent walking( dichotomous); living in geriatric long stay facility( dichotomous); diabetes (dichotomous)

#### Odds Ratios and 95% Confidence Intervals

| Variable                               | Coefficient | Std. Error | Odds ratio | 95% CI           | p      |
|----------------------------------------|-------------|------------|------------|------------------|--------|
| Age ( continuous variable)             | 0.600       | 0.208      | 1.823      | 1.211 to 2.743   | 0.0039 |
| Body mass index( continuous variable)  | -1.852      | 0.721      | 0.156      | 0.038 to 0.645   | 0.0102 |
| Hyponatremia under thiazide treatment  | 2.970       | 1.681      | 19.508     | 0.722 to 527.094 | 0.0773 |
| Inability for independent walking      | -3.318      | 2.289      | 0.036      | 0.0004 to 3.216  | 0.1472 |
| Living in geriatric long stay facility | -3.136      | 2.482      | 0.043      | 0.0003 to 5.630  | 0.2063 |
| Diabetes                               | 2.217       | 1.556      | 9.179      | 0.434 to 193.958 | 0.1543 |

**Table 3** Multivariate predictors of occurrence of osteoporotic vertebral fractures ( one or more for each individual) among hypertensive female patients older than 70 years, all taking chronic anti-hypertensive therapy with thiazide diuretic ( alone or in combination with other anti-hypertensive agents). As reported in the table , hyponatremia per se is not associated with significantly increased risk of osteoporotic vertebral fractures ( $p=0.0773$ ). On the contrary, advanced age appears to be a risk factor (  $p= 0.0039$ ), whereas a relatively high body mass index appears to exert a significant protective effect (OR: 0.156; 95% CI: 0.038 to 0.645;  $p= 0.0102$ ) against occurrence of osteoporotic vertebral fractures.

**Legend:** CI: confidence interval; Std. Error: standard error
